# Supplementary material for: Novel Insights into Potential Cannabis-Related Cancerogenesis from Recent Key Whole Epigenome Screen of Cannabis Dependence and Withdrawal: Epidemiological Commentary and Explication of Schrott et al.
Source: MDPI journal article supplement (doi:10.3390/genes14010032), 2022-12-22
Supplement: s1 [file s1]

## Concise Description of Supplementary Materials

CaEpi.txt - Source file for R for computations

R\_Code for Cancer Epigenomics Paper.docx - R Code for computations for graphs and Tables.

Supplementary Table 1\_Canc\_Epigenom.docx - Supplementary Table 1.: List of epigenomic hits by cancer type from Schrott et.al. database (Reference [43]).

**A**

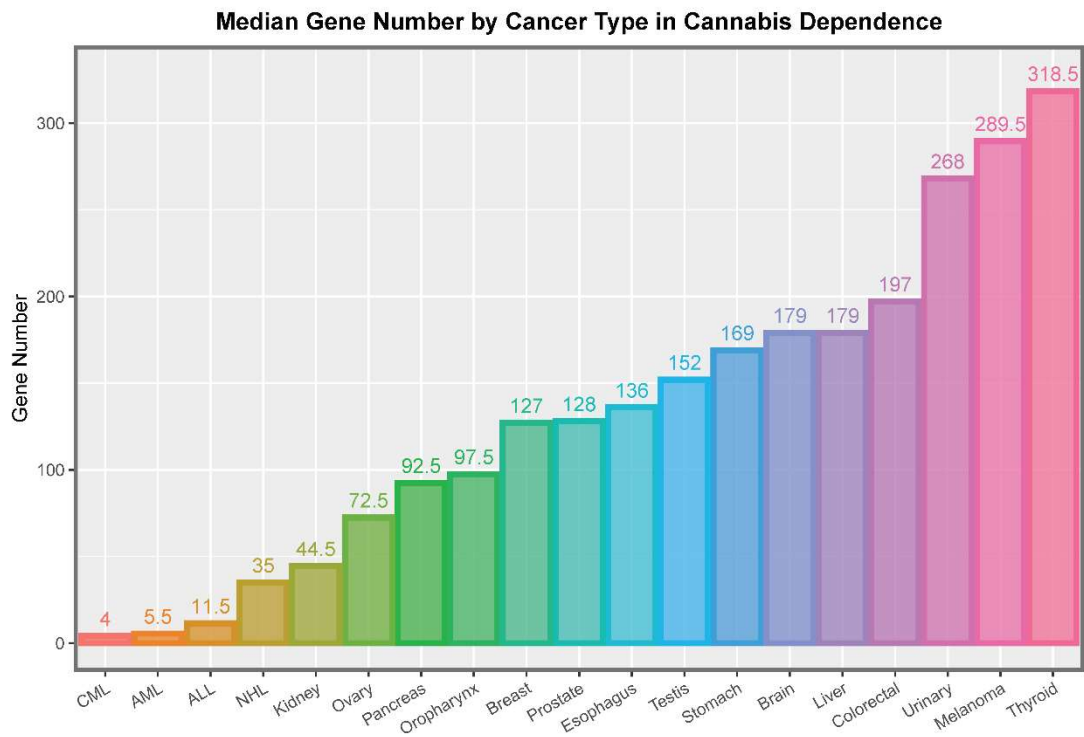

**B**

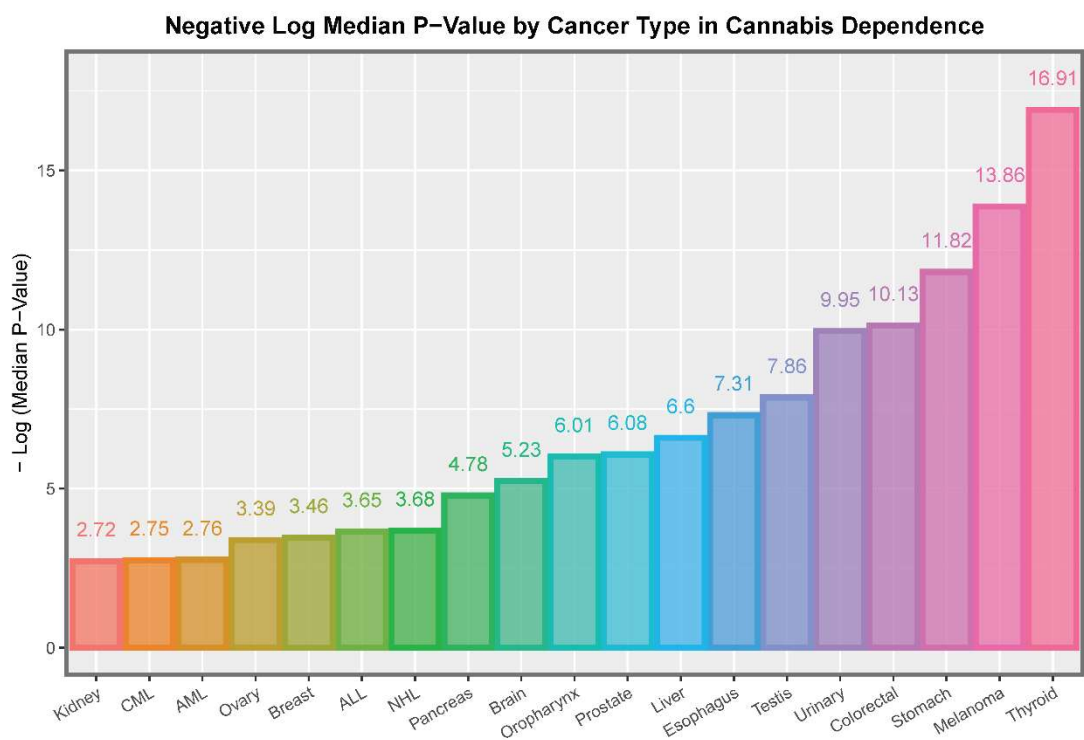

Figure S1: (A) Median Numbers of genes annotated and (B) median *p*-values for each cancer type for cannabis dependence (from Table 2).

**Supplementary Table S1.: Schrott et.al. Cancer Annotation Data Re-Formatted**

| <b>Cancer</b>                                                          | <b>Cancer_Short_Name</b> | <b>Cannabis<br/>Dependence /<br/>Withdrawal</b> | <b>Page</b> | <b>P-Value</b> | <b>Number of<br/>Genes</b> |
|------------------------------------------------------------------------|--------------------------|-------------------------------------------------|-------------|----------------|----------------------------|
| Thyroid                                                                | Thyroid                  | Dependence                                      | 241         | 1.21E-17       | 318                        |
| Thyroid                                                                | Thyroid                  | Dependence                                      | 242         | 1.26E-17       | 319                        |
| Thyroid                                                                | Thyroid                  | Withdrawal                                      | 345         | 0.001410       | 115                        |
| T-Lymphoblastic Leukaemia / Lymphoma                                   | ALL                      | Dependence                                      | 300         | 4.08E-05       | 20                         |
| Philadelphia Chromosome Positive Chronic Myeloid Leukaemia             | CML                      | Dependence                                      | 307         | 0.000213       | 5                          |
| G1/G1 Phase Transition Leukaemia Cell Lines                            | ALL                      | Dependence                                      | 310         | 0.000406       | 3                          |
| Maturation Acute Myeloblastic Leukaemia Cell Lines                     | AML                      | Dependence                                      | 314         | 0.000896       | 2                          |
| Interphase Leukaemia Cell Lines                                        |                          | Dependence                                      | 319         | 0.001730       | 5                          |
| Drug Resistance Leukaemia Cell Lines                                   |                          | Dependence                                      | 319         | 0.001770       | 2                          |
| Apoptosis Chronic Myeloid Leukaemia Cell Lines                         | CML                      | Dependence                                      | 319         | 0.001770       | 2                          |
| Refractory Chronic Myeloid Leukaemia                                   | CML                      | Dependence                                      | 321         | 0.001960       | 4                          |
| Non-M3 Acute Myeloid Leukaemia                                         | AML                      | Dependence                                      | 323         | 0.002570       | 9                          |
| Philadelphia Chromosome Negative Acute Lymphoblastic Leukaemia         | ALL                      | Withdrawal                                      | 340         | 0.000601       | 4                          |
| B-Lymphoblastic Leukaemia / Lymphoma w Recurrent Genetic Abnormalities | ALL                      | Withdrawal                                      | 340         | 0.006110       | 5                          |
| Acute Leukemia                                                         | ALL                      | Withdrawal                                      | 341         | 0.000626       | 36                         |
| Acute Leukemia                                                         | AML                      | Withdrawal                                      | 341         | 0.000626       | 36                         |
| Precursor B-cell Acute Lymphoblastic Leukaemia                         | ALL                      | Withdrawal                                      | 341         | 0.000684       | 16                         |
| Proliferation Leukaemia Cell Lines                                     |                          | Withdrawal                                      | 346         | 0.001870       | 8                          |
| Imatinib Resistant CML in Blast Crisis                                 | CML                      | Withdrawal                                      | 347         | 0.002120       | 2                          |
| Myelodysplastic Syndrome or Leukaemia                                  |                          | Withdrawal                                      | 347         | 0.002160       | 40                         |
| Acute Lymphoblastic Leukaemia                                          | ALL                      | Withdrawal                                      | 348         | 0.002480       | 17                         |
| T-Lymphoblastic Leukaemia / Lymphoma                                   | ALL                      | Withdrawal                                      | 348         | 0.002570       | 9                          |

|                                                             |        |            |     |          |     |
|-------------------------------------------------------------|--------|------------|-----|----------|-----|
| Imatinib Resistant CML                                      | CML    | Withdrawal | 349 | 0.003080 | 2   |
| Imatinib Resistant CML in Accelerated Phase                 | CML    | Withdrawal | 349 | 0.003080 | 2   |
| B-Cell Leukaemia                                            | ALL    | Withdrawal | 349 | 0.003110 | 17  |
| Chemotherapy Refractory ALL                                 | ALL    | Withdrawal | 350 | 0.003620 | 2   |
| Leukaemia                                                   |        | Withdrawal | 351 | 0.003760 | 38  |
| E2A-PBX B-Cell ALL                                          | ALL    | Withdrawal | 351 | 0.004120 | 3   |
| Philadelphia-Like B-cell ALL                                | ALL    | Withdrawal | 352 | 0.004380 | 3   |
| KMT2A-Rearrangement B-Cell ALL                              | ALL    | Withdrawal | 353 | 0.004640 | 3   |
| Accelerated Phase CML                                       | CML    | Withdrawal | 354 | 0.005210 | 3   |
| Philadelphia Positive B-Cell ALL                            | ALL    | Withdrawal | 354 | 0.005820 | 3   |
| Newly Diagnosed Leukaemia                                   |        | Withdrawal | 356 | 0.006650 | 4   |
| Imatinib Resistant Philadelphia positive CML                | CML    | Withdrawal | 356 | 0.006950 | 2   |
| B-Cell Non-Hodgkin Lymphoma                                 | NHL    | Dependence | 303 | 9.67E-05 | 45  |
| Non-Hodgkin Lymphoma                                        | NHL    | Dependence | 307 | 0.000208 | 55  |
| Lymphoma - Hodgkins / DLBCNHL                               | NHL    | Dependence | 314 | 0.000777 | 3   |
| B-Cell Non-Hodgkin Lymphoma                                 | NHL    | Withdrawal | 354 | 0.005700 | 19  |
| T-Lymphoblastic Leukaemia / Lymphoma                        | NHL    | Dependence | 300 | 4.08E-05 | 20  |
| B-cell Lymphoma                                             | NHL    | Dependence | 301 | 5.17E-05 | 48  |
| Lymphoma                                                    | NHL    | Dependence | 303 | 0.000101 | 64  |
| Diffuse Lymphoma                                            | NHL    | Dependence | 313 | 0.000629 | 35  |
| Diffuse B-cell Lymphoma                                     | NHL    | Dependence | 315 | 0.000927 | 32  |
| High Grade Lymphoma                                         | NHL    | Dependence | 324 | 0.002690 | 20  |
| B-Cell Non-Hodgkin Lymphoma Recurrent Genetic Abnormalities | NHL    | Withdrawal | 340 | 0.000611 | 5   |
| B-Cell Lymphoblastic Lymphoma                               | NHL    | Withdrawal | 343 | 0.000891 | 4   |
| T-Cell Lymphoblastic Leukaemia / Lymphoma                   | NHL    | Withdrawal | 348 | 0.002570 | 9   |
| KMT2A-Rearrangement B-Cell Lymphoma                         | NHL    | Withdrawal | 353 | 0.004640 | 3   |
| B-Cell Acute Lymphoblastic Lymphoma                         | NHL    | Withdrawal | 355 | 0.006460 | 3   |
| Breast / Colorectal cancer                                  | Breast | Dependence | 280 | 3.25E-08 | 233 |

|                                               |                |            |     |          |     |
|-----------------------------------------------|----------------|------------|-----|----------|-----|
| Colorectal / Breast cancer                    | Colorectal     | Dependence | 280 | 3.25E-08 | 233 |
| Breast / Gynaecological cancer                | Gynaecological | Dependence | 281 | 1.08E-08 | 233 |
| Gynaecological / Breast cancer                | Gynaecological | Dependence | 281 | 1.08E-08 | 233 |
| Breast / Pancreatic cancer                    | Breast         | Dependence | 290 | 2.64E-06 | 181 |
| Pancreatic / Breast cancer                    | Pancreas       | Dependence | 290 | 2.64E-06 | 181 |
| Breast / Ovarian cancer                       | Breast         | Dependence | 304 | 0.000116 | 121 |
| Ovarian / Breast                              | Ovary          | Dependence | 304 | 0.000116 | 121 |
| Breast cancer cell lines morphogenesis        | Breast         | Dependence | 312 | 0.000573 | 3   |
| Breast / Ovarian cancer                       | Breast         | Dependence | 315 | 0.000965 | 133 |
| Ovarian / Breast                              | Ovary          | Dependence | 315 | 0.000965 | 133 |
| Breast cancer cell lines metastatic potential | Breast         | Dependence | 316 | 0.00131  | 3   |
| Breast cancer cell lines cell proliferation   | Breast         | Withdrawal | 344 | 0.00127  | 14  |
| Breast / Gynaecological cancer                | Breast         | Withdrawal | 346 | 0.00201  | 91  |
| Gynaecological / Breast cancer                | Gynaecological | Withdrawal | 346 | 0.00201  | 91  |
| Breast / Pancreatic cancer                    | Breast         | Withdrawal | 355 | 0.00592  | 71  |
| Pancreatic / Breast cancer                    | Pancreas       | Withdrawal | 355 | 0.00592  | 71  |
| Breast cancer cell lines cell division        | Breast         | Withdrawal | 358 | 0.00701  | 1   |
|                                               |                |            |     |          |     |
| Genitourinary adenocarcinoma                  | Urinary        | Dependence | 259 | 2.54E-14 | 259 |
| Genitourinary adenocarcinoma                  | Urinary        | Dependence | 271 | 1.08E-11 | 277 |
| Malignant genitourinary solid tumour          | Urinary        | Dependence | 277 | 1.08E-10 | 277 |
| Genitourinary adenocarcinoma                  | Urinary        | Dependence | 277 | 1.15E-10 | 277 |
| Urinary tract cancer                          | Urinary        | Dependence | 320 | 0.001890 | 84  |
| Morphology of urinary system                  | Urinary        | Dependence | 322 | 0.002200 | 17  |
| Genitourinary adenocarcinoma                  | Urinary        | Withdrawal | 336 | 0.000216 | 97  |
| Genitourinary adenocarcinoma                  | Urinary        | Withdrawal | 338 | 0.000322 | 359 |
| Malignant genitourinary solid tumour          | Urinary        | Withdrawal | 339 | 0.000466 | 111 |
| Genitourinary tumour                          | Urinary        | Withdrawal | 340 | 0.000547 | 112 |
|                                               |                |            |     |          |     |
| Prostate cancer                               | Prostate       | Dependence | 279 | 2.88E-08 | 148 |
| Prostatic adenocarcinoma                      | Prostate       | Dependence | 287 | 8.39E-07 | 123 |
| Prostatic carcinoma                           | Prostate       | Dependence | 288 | 9.39E-07 | 128 |

|                                   |          |            |     |          |     |
|-----------------------------------|----------|------------|-----|----------|-----|
| Protate cancer                    | Prostate | Withdrawal | 340 | 5.33E-04 | 59  |
| Prostatic adenocarcinoma          | Prostate | Withdrawal | 350 | 0.00349  | 48  |
| Prostatic carcinoma               | Prostate | Withdrawal | 50  | 0.00363  | 50  |
| Prostate cancer cell adhesion     | Prostate | Withdrawal | 357 | 0.00701  | 1   |
| Male Genital Neoplasm             | Testis   | Dependence | 279 | 1.14E-08 | 153 |
| Malignant Male Genital Neoplasm   | Testis   | Dependence | 279 | 1.60E-08 | 151 |
| Male Genital Neoplasm             | Testis   | Withdrawal | 341 | 6.75E-04 | 60  |
| Ovarian cancer                    | Ovary    | Dependence | 305 | 0.000140 | 68  |
| Ovarian Tumour                    | Ovary    | Dependence | 308 | 0.000257 | 74  |
| Ovarian cancer                    | Ovary    | Dependence | 312 | 0.000562 | 71  |
| Ovarian adenocarcinoma            | Ovary    | Dependence | 314 | 0.000792 | 62  |
| Ovarian cancer                    | Ovary    | Withdrawal | 356 | 0.007010 | 1   |
| Brain glioma                      | Brain    | Dependence | 284 | 1.39E-07 | 227 |
| Brain tumour                      | Brain    | Dependence | 286 | 2.29E-07 | 228 |
| High grade Astrocytoma            | Brain    | Dependence | 294 | 5.95E-06 | 179 |
| Brain astrocytoma                 | Brain    | Dependence | 294 | 6.45E-06 | 173 |
| Brain cancer                      | Brain    | Dependence | 308 | 0.000269 | 98  |
| Brain cell - cell movement        | Brain    | Dependence | 319 | 0.001740 | 8   |
| Brain astrocytoma                 | Brain    | Withdrawal | 330 | 5.12E-05 | 77  |
| Brain tumour                      | Brain    | Withdrawal | 337 | 2.56E-04 | 94  |
| Brain glioma                      | Brain    | Withdrawal | 339 | 0.000520 | 92  |
| Brain cell - cell movement        | Brain    | Withdrawal | 347 | 0.002040 | 5   |
| Glioma                            | Brain    | Dependence | 281 | 5.33E-08 | 235 |
| Glioma cancer                     | Brain    | Dependence | 282 | 6.69E-08 | 231 |
| Brain glioma                      | Brain    | Dependence | 284 | 1.39E-07 | 227 |
| Grade 3-4 Glioma cancer           | Brain    | Dependence | 289 | 2.18E-06 | 194 |
| Grade IV High grade glioma cancer | Brain    | Dependence | 293 | 5.70E-05 | 173 |
| Gliomatosis cerebri               | Brain    | Dependence | 307 | 0.000197 | 94  |
| Grade IV High grade glioma cancer | Brain    | Withdrawal | 329 | 0.000047 | 77  |

|                             |            |            |     |          |     |
|-----------------------------|------------|------------|-----|----------|-----|
| Glioma                      | Brain      | Withdrawal | 330 | 0.000063 | 98  |
| Grade 3-4 Glioma cancer     | Brain      | Withdrawal | 337 | 0.000266 | 82  |
| Glioma cancer               | Brain      | Withdrawal | 338 | 0.000305 | 94  |
| Glioma cancer               | Brain      | Withdrawal | 339 | 0.000520 | 92  |
| Astrocytoma                 | Brain      | Dependence | 291 | 3.52E-06 | 181 |
| Astrocytoma                 | Brain      | Dependence | 293 | 5.70E-06 | 173 |
| Astrocytoma High grade      | Brain      | Dependence | 294 | 5.95E-06 | 179 |
| Astrocytoma                 | Brain      | Dependence | 294 | 6.45E-06 | 179 |
| Astrocytoma High grade      | Brain      | Withdrawal | 326 | 8.42E-06 | 82  |
| Astrocytoma Grade IV        | Brain      | Withdrawal | 329 | 4.77E-05 | 77  |
| Astrocytoma                 | Brain      | Withdrawal | 330 | 5.12E-05 | 77  |
| Colon carcinoma             | Colorectal | Dependence | 264 | 7.27E-13 | 195 |
| Colorectal carcinoma        | Colorectal | Dependence | 266 | 1.59E-12 | 201 |
| Colon carcinoma             | Colorectal | Dependence | 267 | 2.04E-12 | 199 |
| Colon carcinoma             | Colorectal | Dependence | 268 | 2.30E-12 | 197 |
| Colon carcinoma             | Colorectal | Dependence | 268 | 2.84E-12 | 191 |
| Colon carcinoma             | Colorectal | Dependence | 275 | 7.38E-11 | 213 |
| Colon carcinoma             | Colorectal | Dependence | 278 | 1.95E-10 | 214 |
| Colon carcinoma             | Colorectal | Withdrawal | 341 | 0.000617 | 74  |
| Colon carcinoma             | Colorectal | Withdrawal | 341 | 0.000687 | 71  |
| Colon carcinoma             | Colorectal | Withdrawal | 342 | 0.000748 | 70  |
| Colon carcinoma             | Colorectal | Withdrawal | 342 | 0.000867 | 72  |
| Colon carcinoma             | Colorectal | Withdrawal | 344 | 0.001290 | 72  |
| Colon carcinoma             | Colorectal | Withdrawal | 352 | 0.004760 | 78  |
| Rectum tumour               | Colorectal | Dependence | 311 | 0.000450 | 32  |
| Rectum tumour               | Colorectal | Dependence | 318 | 0.001550 | 30  |
| Rectum tumour               | Colorectal | Dependence | 320 | 0.001820 | 29  |
| Rectum tumour               | Colorectal | Withdrawal | 348 | 0.002290 | 15  |
| Renal clear cell carcinoma  | Kidney     | Dependence | 315 | 0.00101  | 41  |
| Upper renal tract carcinoma | Kidney     | Dependence | 324 | 0.00283  | 48  |

|                                             |           |            |     |          |     |
|---------------------------------------------|-----------|------------|-----|----------|-----|
| Liver carcinoma                             | Liver     | Dependence | 283 | 1.17E-08 | 168 |
| Liver carcinoma                             | Liver     | Dependence | 287 | 2.52E-07 | 171 |
| Liver carcinoma                             | Liver     | Dependence | 186 | 5.13E-06 | 186 |
| Liver tumour                                | Liver     | Dependence | 292 | 5.13E-06 | 186 |
| Hepatobiliary system cancer                 | Liver     | Dependence | 286 | 2.47E-07 | 179 |
| Pancreatobiliary tumour                     | Pancreas  | Dependence | 288 | 9.10E-07 | 124 |
| Pancreatic cancer                           | Pancreas  | Dependence | 297 | 1.19E-05 | 95  |
| Pancreatic cancer                           | Pancreas  | Dependence | 298 | 1.26E-06 | 106 |
| Pancreatic cancer                           | Pancreas  | Dependence | 299 | 0.000021 | 90  |
| Pancreatic cancer                           | Pancreas  | Dependence | 300 | 0.000033 | 85  |
| Pancreatic cancer                           | Pancreas  | Dependence | 301 | 0.000060 | 82  |
| Pancreatic cancer cell lines cell migration | Pancreas  | Dependence | 323 | 0.002390 | 6   |
| Pancreatic cancer cell lines cell invasion  | Pancreas  | Withdrawal | 353 | 0.005210 | 3   |
| Pancreatic cancer cell lines G1 phase       | Pancreas  | Withdrawal | 355 | 0.006200 | 2   |
| Pancreatic cancer                           | Pancreas  | Withdrawal | 356 | 0.00646  | 36  |
| Melanoma - cutaneous                        | Melanoma  | Dependence | 256 | 3.70E-15 | 281 |
| Melanoma                                    | Melanoma  | Dependence | 258 | 2.36E-14 | 298 |
| Melanoma                                    | Melanoma  | Withdrawal | 326 | 7.71E-06 | 110 |
| Melanoma                                    | Melanoma  | Withdrawal | 330 | 6.21E-05 | 115 |
| Myeloma - cell lines cell death             | Myeloma   | Withdrawal | 345 | 0.00159  | 5   |
| Myeloma - cell lines apoptosis              | Myeloma   | Withdrawal | 355 | 0.00622  | 4   |
| Myeloma - cell lines cell adhesion          | Myeloma   | Withdrawal | 357 | 0.00701  | 1   |
| Gastroesophageal carcinoma                  | Stomach   | Dependence | 262 | 3.15E-13 | 169 |
| Gastroesophageal carcinoma                  | Esophagus | Dependence | 262 | 3.15E-13 | 169 |
| Gastroesophageal carcinoma                  | Stomach   | Dependence | 265 | 1.53E-12 | 171 |
| Gastroesophageal carcinoma                  | Esophagus | Dependence | 265 | 1.53E-12 | 171 |
| Gastroesophageal carcinoma                  | Stomach   | Dependence | 282 | 9.77E-08 | 103 |



|                                     |            |            |     |          |     |
|-------------------------------------|------------|------------|-----|----------|-----|
| Gastroesophageal carcinoma          | Esophagus  | Dependence | 282 | 9.77E-08 | 103 |
| Esophageal adenocarcinoma           | Esophagus  | Dependence | 320 | 0.001880 | 22  |
| Gastroesophageal carcinoma          | Stomach    | Withdrawal | 331 | 0.000068 | 64  |
| Gastroesophageal carcinoma          | Esophagus  | Withdrawal | 331 | 0.000068 | 64  |
| Esophageal carcinoma                | Esophagus  | Withdrawal | 347 | 0.002020 | 15  |
| Gastroesophageal adenocarcinoma     | Esophagus  | Withdrawal | 354 | 0.005250 | 38  |
| Gastroesophageal adenocarcinoma     | Stomach    | Withdrawal | 354 | 0.005250 | 38  |
| Upper aerodigestive tract carcinoma | Oropharynx | Dependence | 283 | 1.25E-07 | 97  |
| Upper aerodigestive tract carcinoma | Oropharynx | Dependence | 285 | 1.82E-06 | 98  |
| Upper aerodigestive tract carcinoma | Oropharynx | Withdrawal | 327 | 1.60E-05 | 44  |
